# Supplementary material
Source: Springer Nature journal article supplement (https://www.springermedizin.de/resource/supplementary/12889_2011_4032_MOESM2_ESM.pdf/9491260)

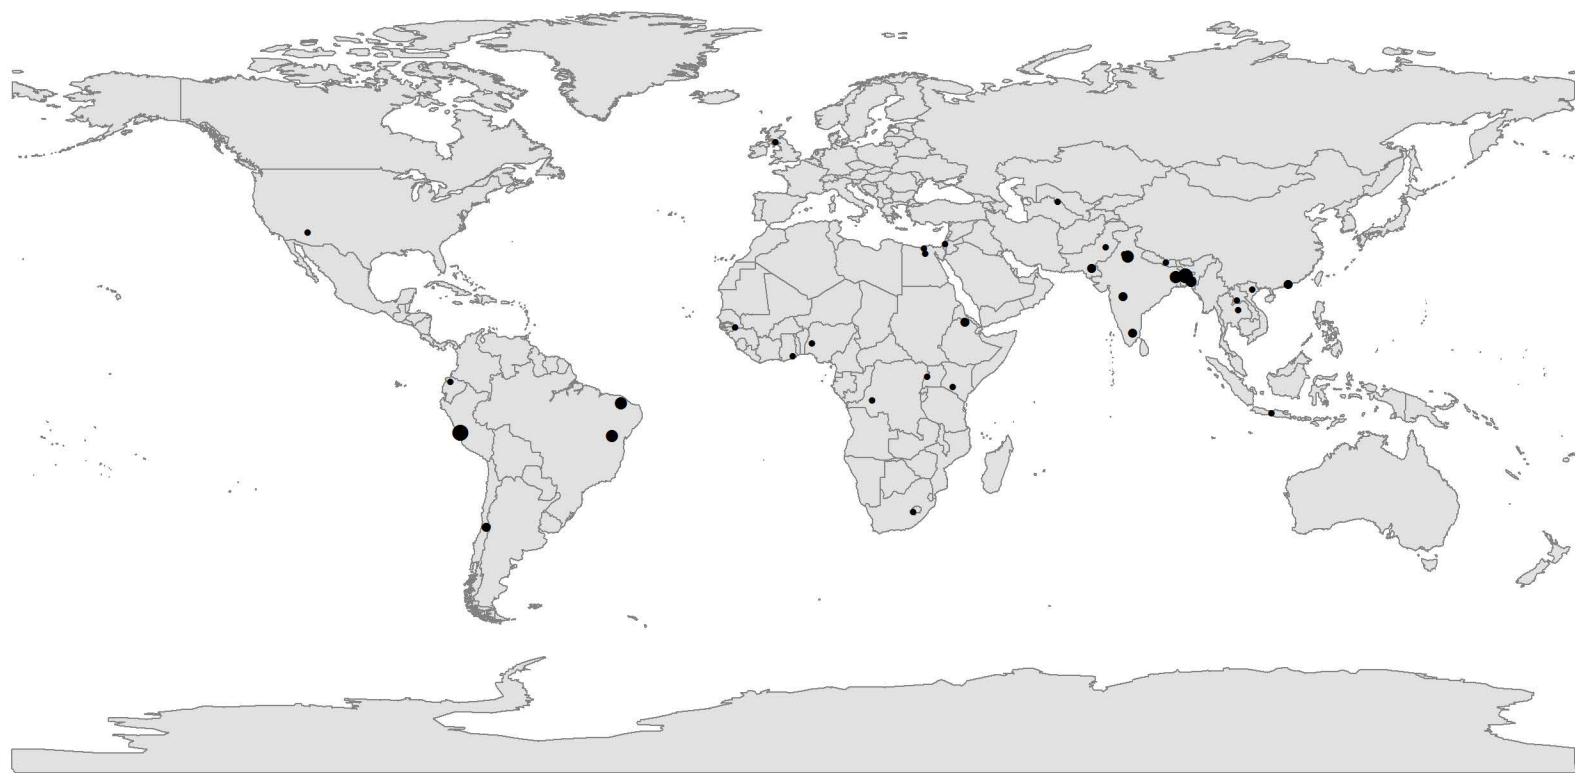

- One Study
- Two Studies
- Three Studies
- Four Studies
- Five Studies
- Six Studies

Supplement: MOESM2 [file 9491260]
